# Supplementary material for: QTL × environment interactions underlie adaptive divergence in switchgrass across a large latitudinal gradient
Source: PubMed Central journal article supplement (PMC6600931; doi:10.1073/pnas.1821543116), 2019-06-10
Supplement: pnas.1821543116.sapp.pdf [file pnas.1821543116.sapp.pdf]

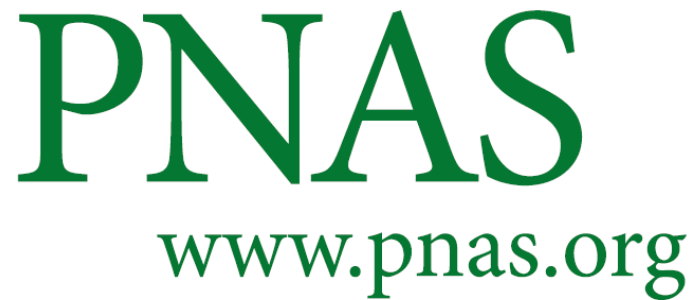

## Supplementary Information for

QTL x environment interactions underlie adaptive divergence in switchgrass across a large latitudinal gradient

David B. Lowry, John T. Lovell, Li Zhang, Jason Bonnette, Philip A. Fay, Robert B. Mitchell, John Lloyd-Reilley, Arvid R. Boe, Yanqi Wu, Francis M. Rouquette Jr., Richard L. Wynia, Xiaoyu Weng, Kathrine D. Behrman, Adam Healey, Kerrie Barry, Anna Lipzen, Diane Bauer, Aditi Sharma, Jerry Jenkins, Jeremy Schmutz, Felix B. Fritschi, Thomas E. Juenger

Email: [tjuenger@mail.utexas.edu](mailto:tjuenger@mail.utexas.edu)

### **This PDF file includes:**

Figs. S1 to S16  
Tables S1 to S7

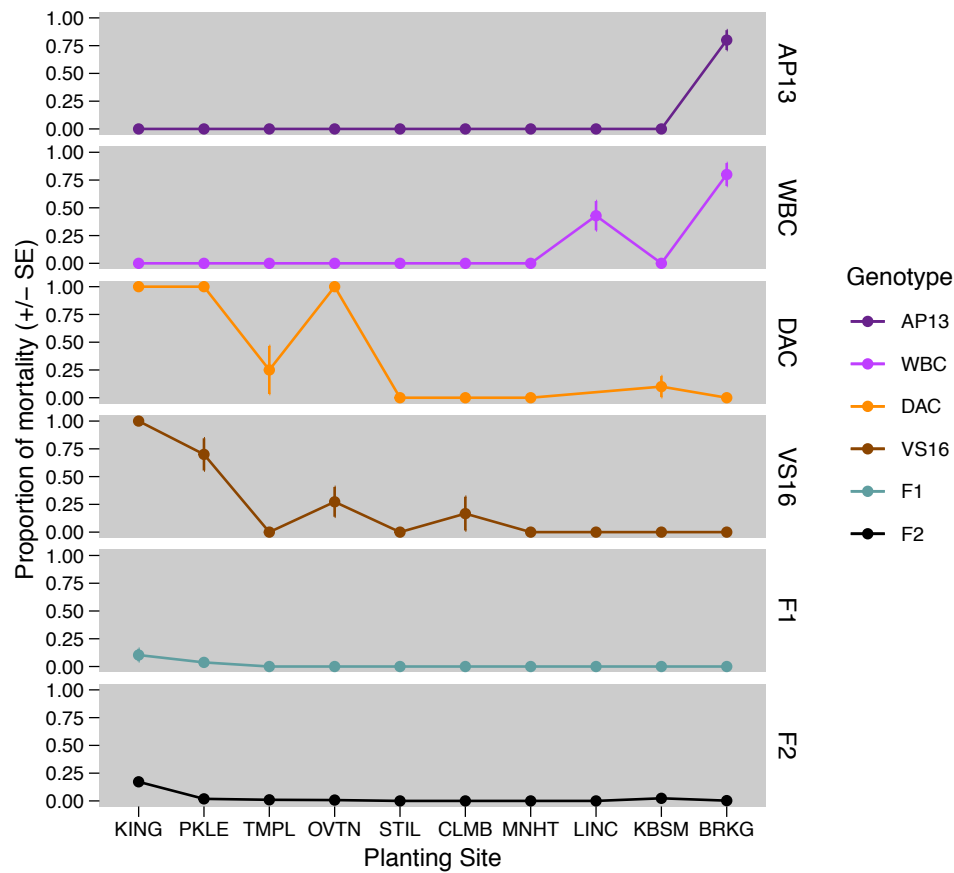

**Fig. S1.** The proportion of mortality across the 10 field sites, as of the spring of 2018, for each of the four grandparental genotypes, the F1 hybrids, and the outbred hybrid mapping population. Proportion +/- standard error are presented. Sites are ordered as in Figure 1, by increasing latitude.

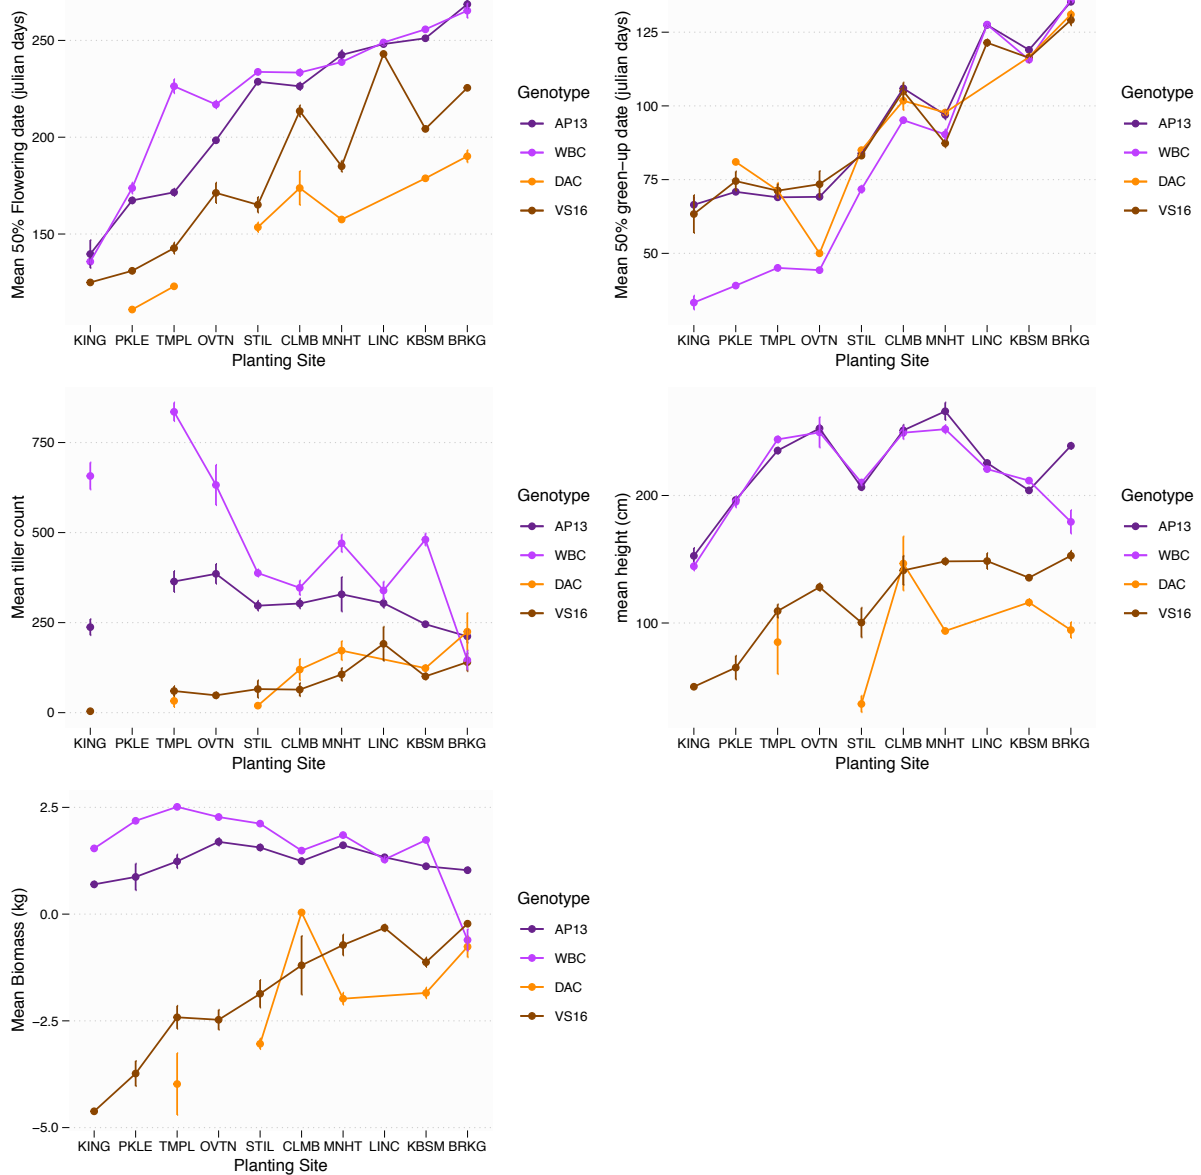

**Fig. S2.** The distribution of five traits across the 10 sites for each of the four grandparental genotypes. Sites are ordered as in Fig. 1, by increasing latitude. Data are presented for the 2017 harvest only.

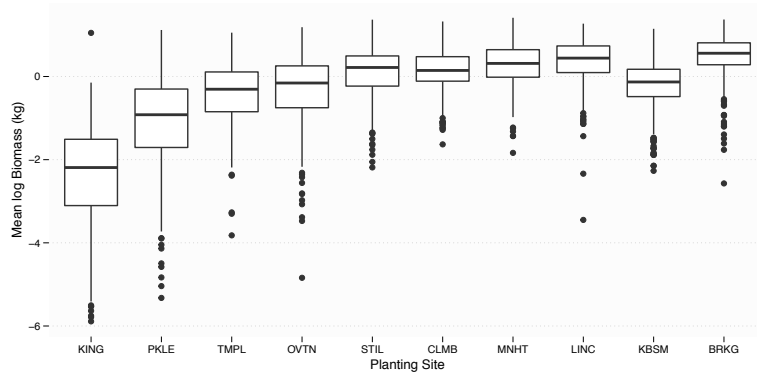

**Fig. S3.** The distribution of biomass (natural log transformed) in kilograms across the outbred mapping population at each site. Boxes represent the interquartile range. Sites are ordered as in Figure 1, by increasing latitude. Data are presented for the 2017 harvest only.

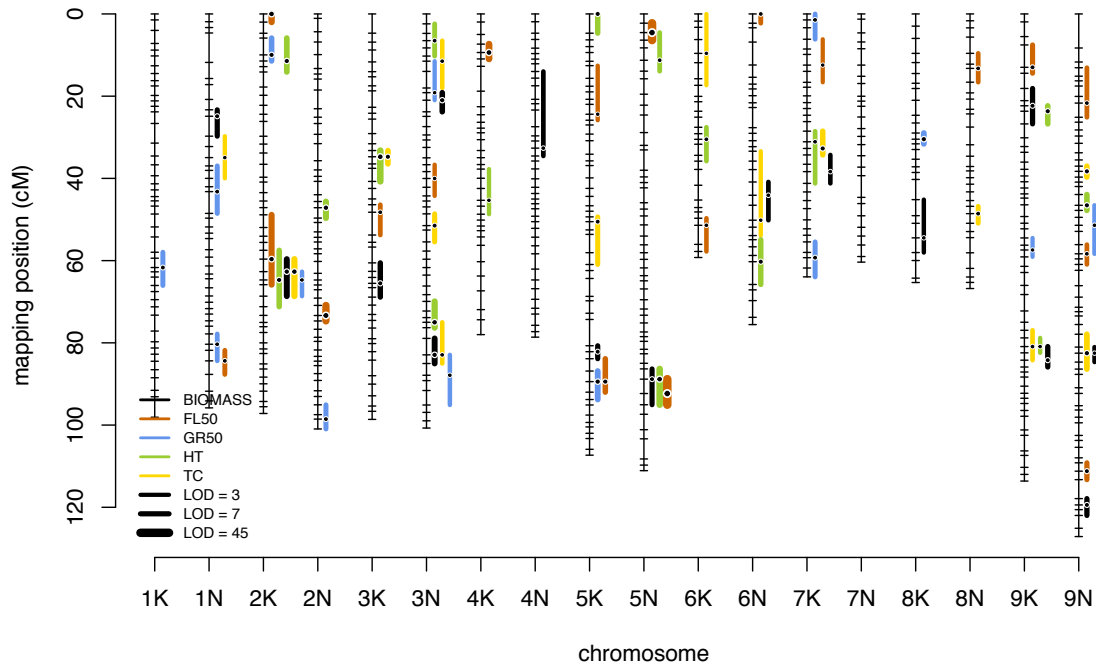

**Fig. S4.** The location of QTL for all five traits across the switchgrass genome. QTL peaks are presented as black/white points on the assembled linkage map. Vertical lines around these peaks represent the QTL confidence interval, defined as the regions where the profile declines by  $\leq 1$  LOD. QTL estimates and confidence intervals are from the across-years (2016 and 2017) QTL model.

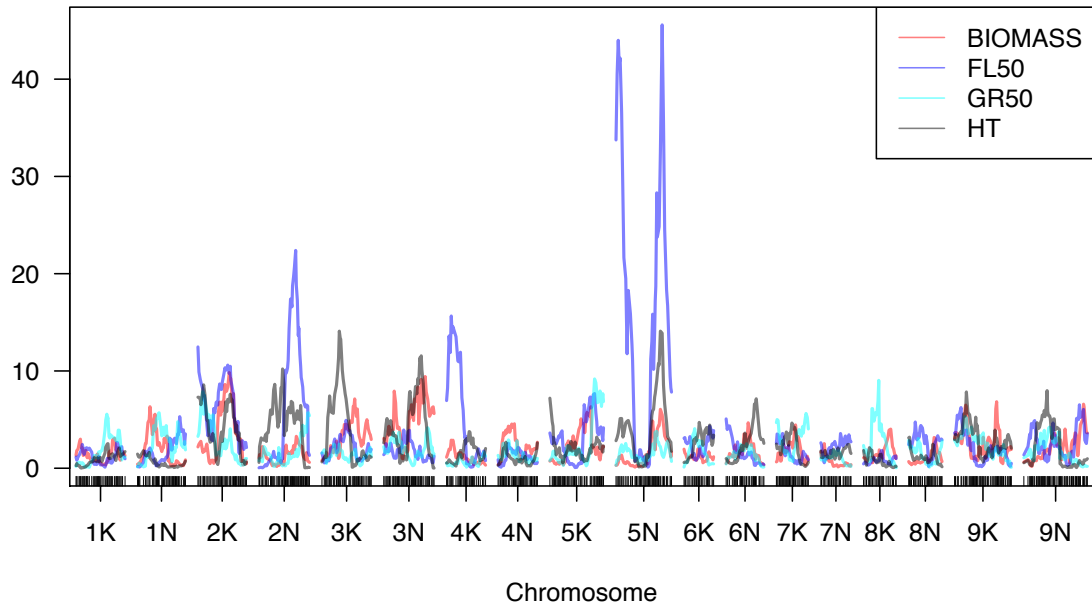

**Fig. S5.** Genstat-derived  $-\log_{10} P$ -value profiles for the four of the focal traits along the 18 *Panicum virgatum* linkage groups. QTL estimates and confidence intervals are from the across-years (2016 and 2017) QTL model.

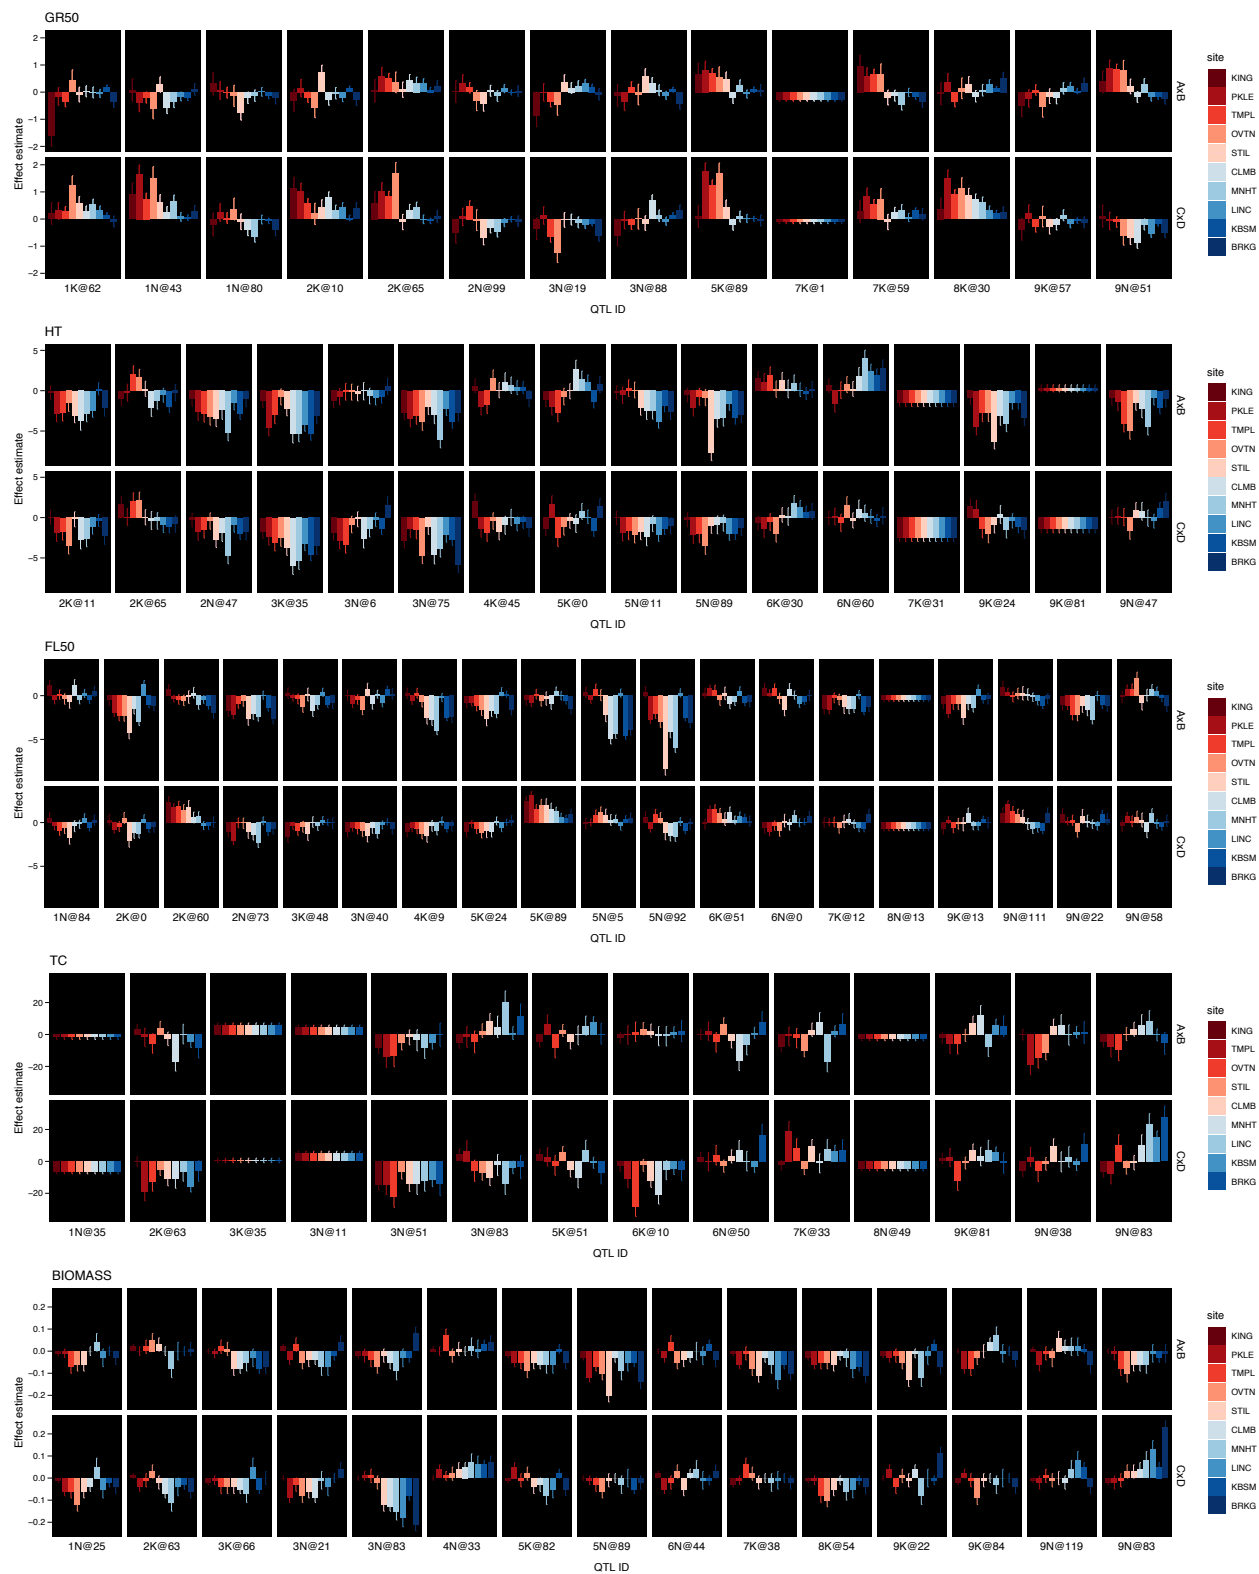

**Fig. S6.** The QTL effect distribution across the five traits. Sites are colored following Fig. 1. Estimates  $\pm$  SE are presented for each side of the cross and each QTL. See Fig. 3 for more details about interpretation of the additive effects displayed in the figure. Effects from the full across-year model were extracted, but only effects in 2017 are presented.

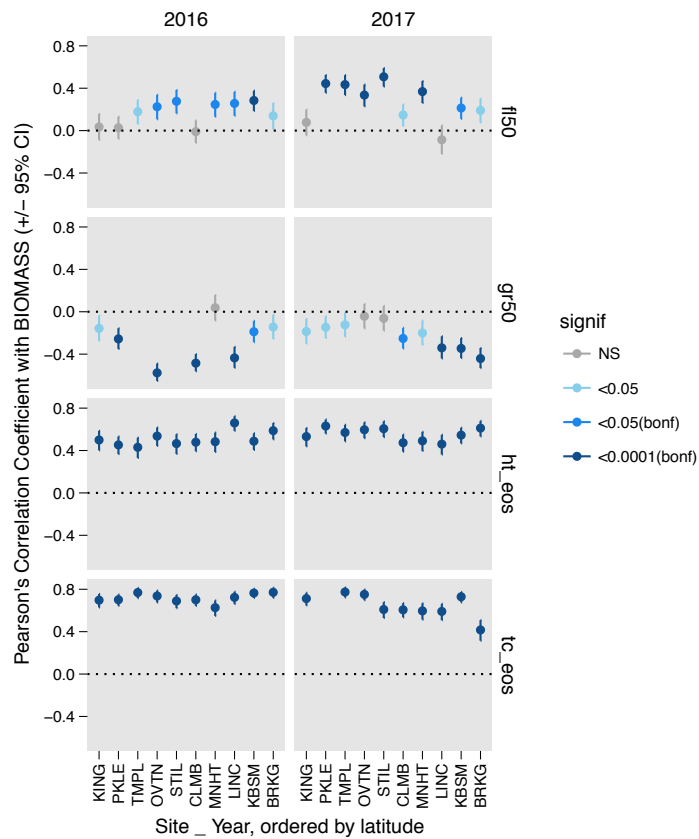

**Fig. S7.** Phenotypic correlations between biomass and each of the four other traits in the 4-way recombinant mapping population. R values +/- 95% confidence intervals are plotted. Significance is determined by P-values, where those that are marginally significant (uncorrected P-value <= 0.05) are in light blue, while dark blue estimates are significant after Bonferroni multiple-test corrections. Data are from the 2017 harvest.



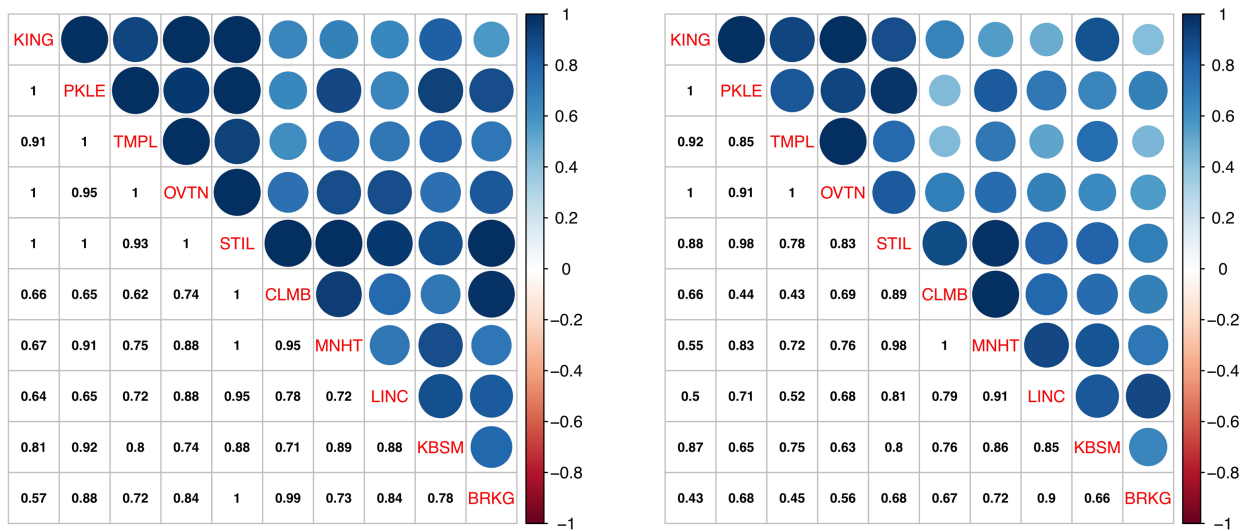

**Fig. S8.** Pairwise genetic correlations for biomass across field sites for the 4-way recombinant mapping population. All correlations were positive across for both the 2016 (left) and 2017 (right) field seasons.

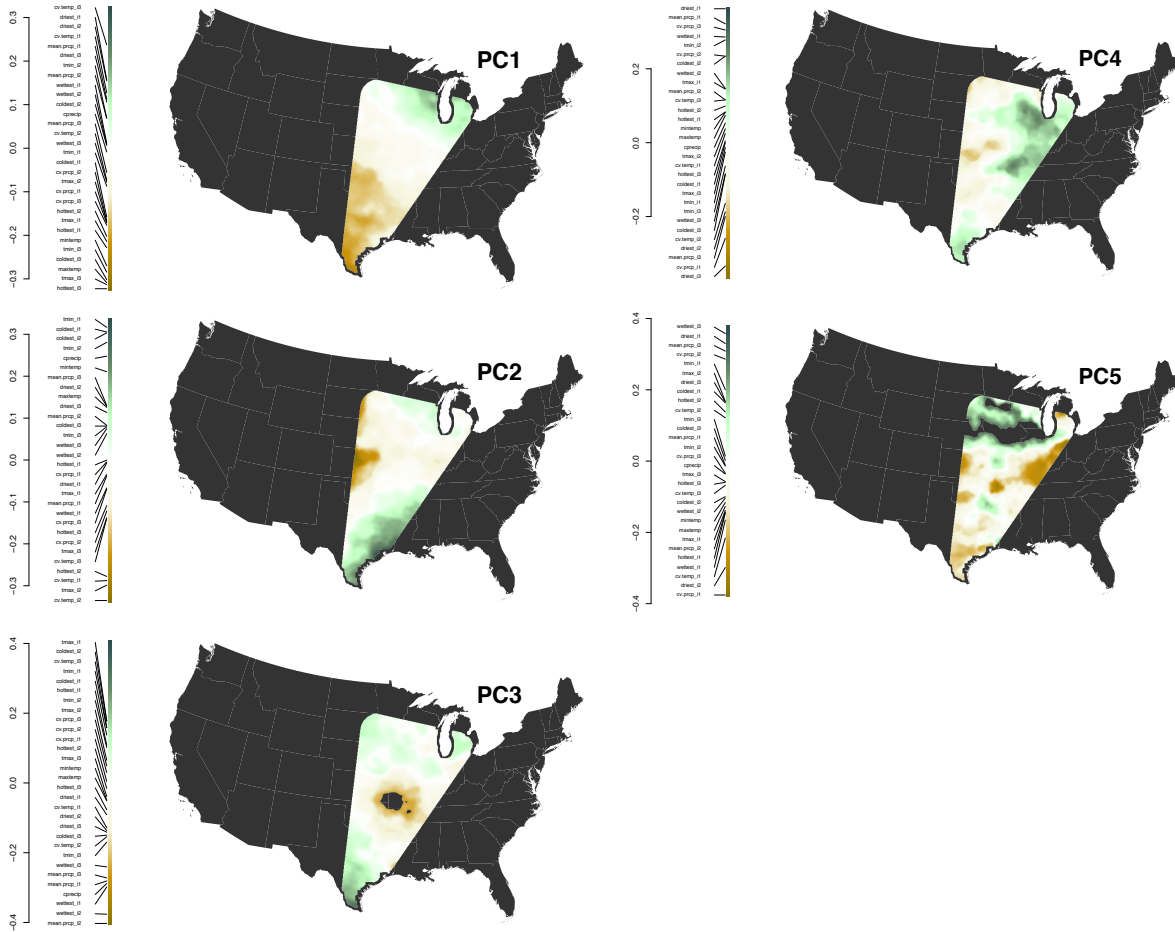

**Fig. S9.** Spatial distribution of the top five climatic principal component (PC) axes. The significance of each of these as predictors for QTL effects are presented in Table S6. Values outside the range of values observed at the 10 sites ( $\pm 20\%$ ) are masked.

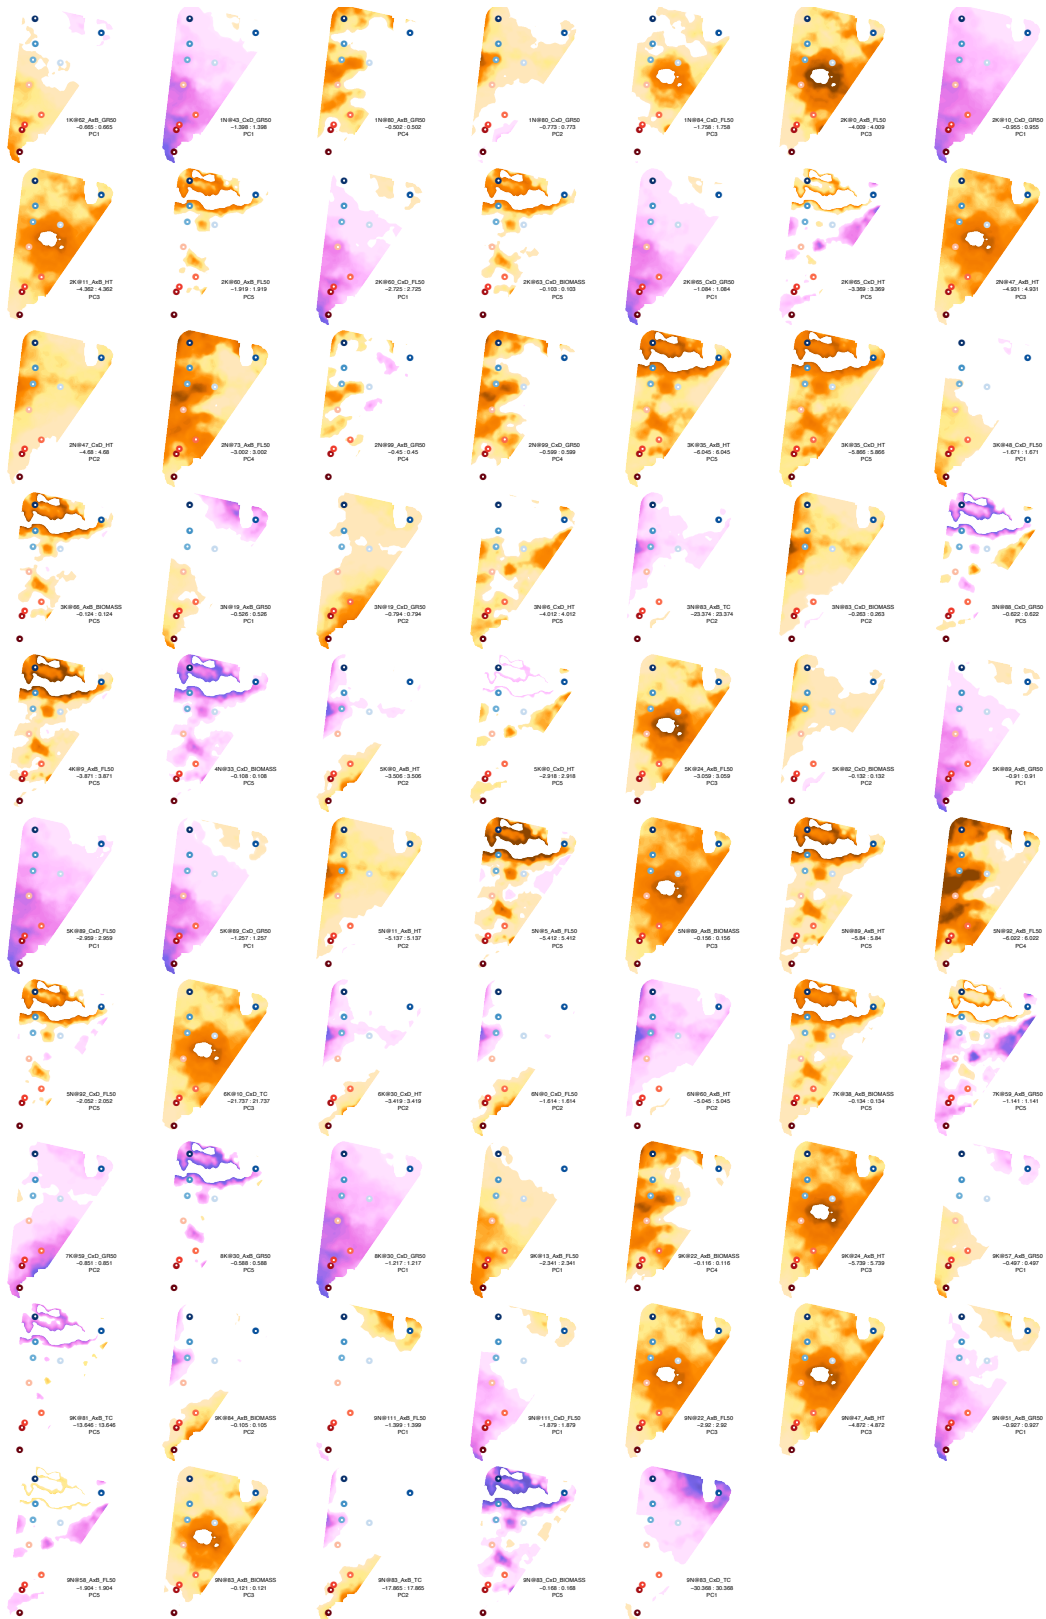

**Fig. S10.** Predicted QTL effects for all 68 QTL with significant effect-climate relationships, as in Fig. 3.

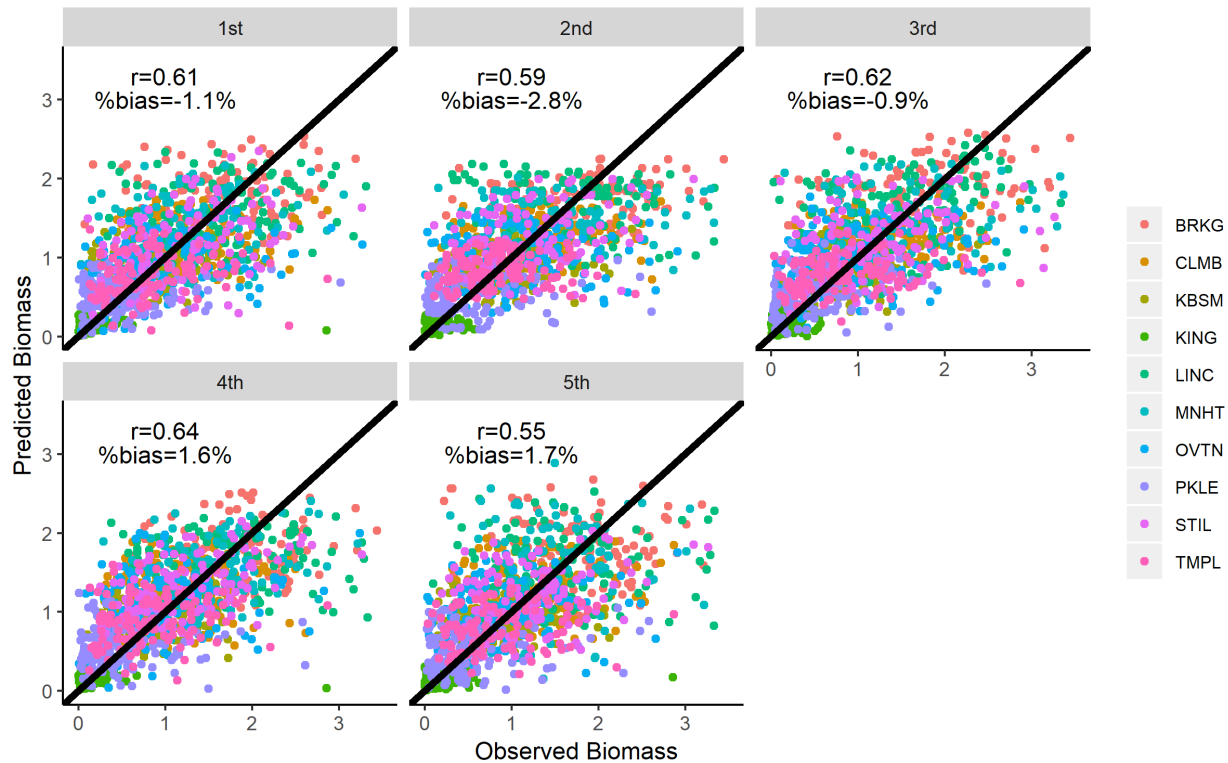

**Fig. S11.** The quality of the predictions from the full Genotype x Environment (G x E) model was evaluated using a fivefold cross-validation technique. Specifically, we split the individuals, along with their genotypic and phenotypic information, into a training set (80% of the population) and validation set (the remaining 20% of the population). The training set was used to construct the G x E model and the validation set was used to evaluate the model as an independent dataset. The G x E model was extracted from Genstat runs and reconstructed in R to predict biomass for the validation genotypes based on the additive and dominance effects. Root mean square error (rmse), percentage of bias (bias%), and the prediction accuracy ( $r$ ) between the model predictions and field observations were used as statistical measures for model performance. The fivefold cross validation for biomass had an average rmse of 0.591, %bias of -0.3%, and prediction accuracy of 0.601.

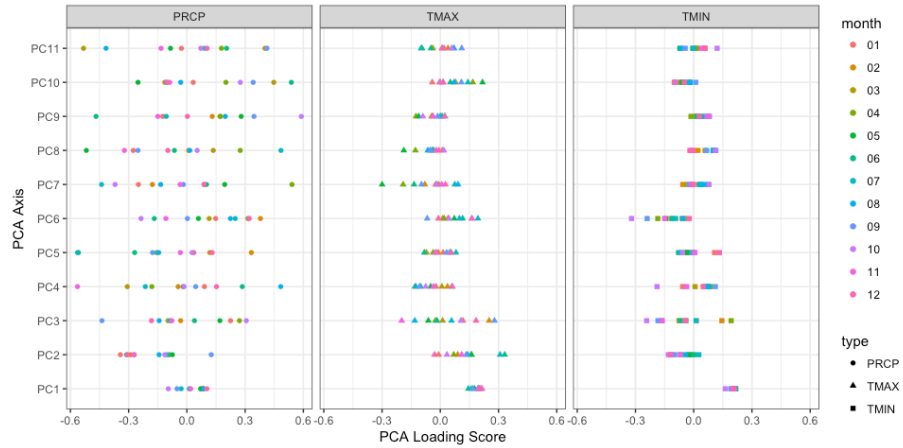

**Fig. S12.** PCA loadings of the monthly weather data for prediction of the beginning and end of growing season. The month of data collection is indicated by its two-digit numeric code following the variable tested. For example, 95<sup>th</sup> quantile of maximum temperature in September is specified as TMAX\_09.

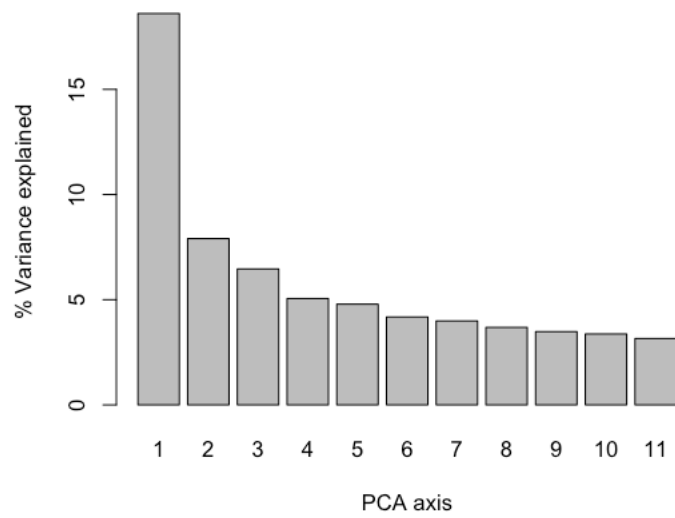

**Fig. S13.** Percent variance explained of PCA loadings of the monthly weather data for prediction of the beginning and end of growing season.

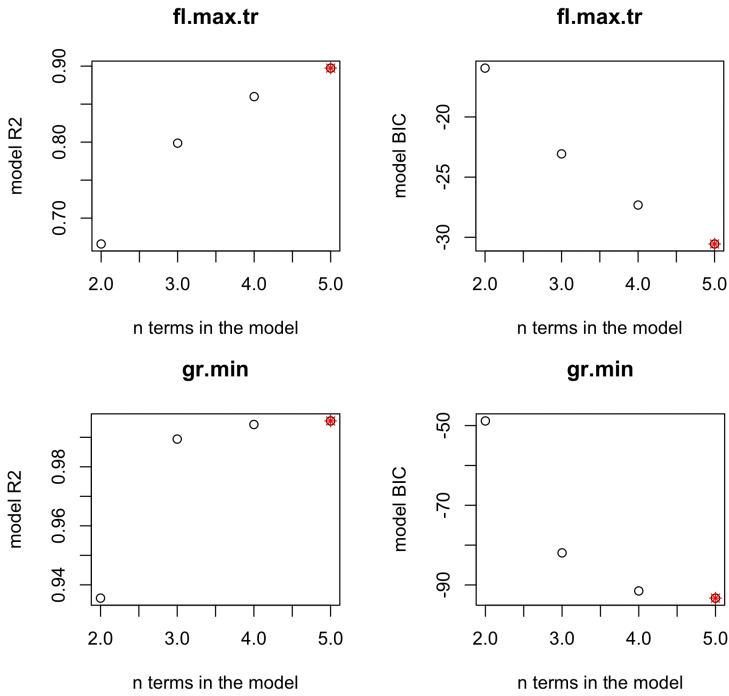

**Fig. S14.** Selection of the best model for growing season. We employed an iterative model-selection protocol, where we chose the best model (lowest BIC) among up to 4 PCA eigenvectors calculated from the monthly weather variables (n terms also include the intercept).

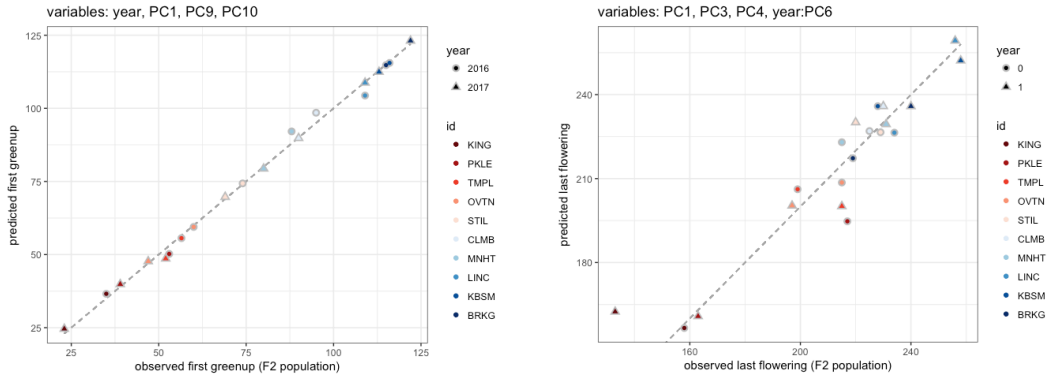

**Fig. S15.** Prediction of growing season start (left) and end (right). Observed (x) and predicted (y) data are presented for each year (2016 = “0” are circles, 2017 = “1” are triangles). Site colors match those in Figure 1. Note the extremely strong prediction accuracy for greenup time and the slightly lower accuracy for time of last flowering. This indicates that greenup is driven by a linear combination of climatic variables that are well captured by our principal components. However, higher-order interactions, or climate variables that were not present in our data also likely predict the last flowering time.



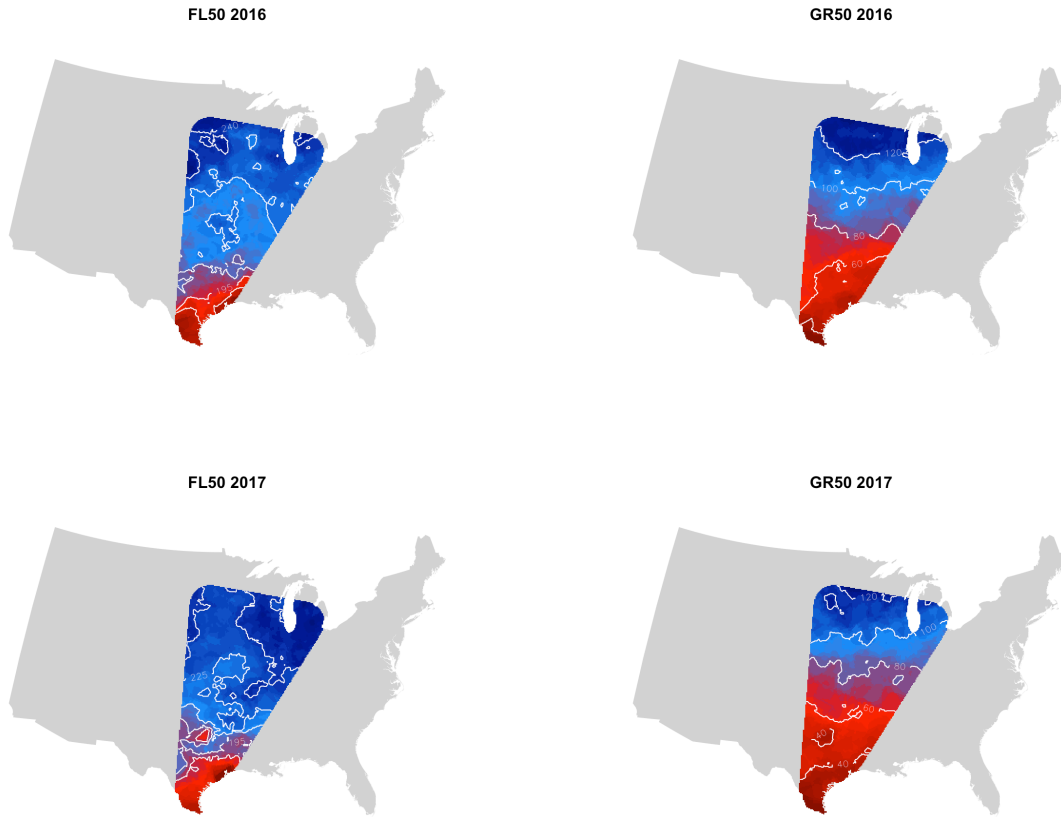

**Fig. S16.** Prediction of growing season start (left) and end (right) for all 651 NOAA weather stations, interpolated across the landscape. Flowering (“FL50”, left) and greenup (“GR50”, right) are presented for 2016 (top) and 2017 (bottom). Predicted values are presented along the white contour lines.

**Table S1** List of discovered QTL across 2016 and 2017. The position (POS), LOD score, and QTLxE interactions (yes / no) for all significant QTL.

| Phenotype | CHR | POS | LOD    | QTLxE | Phenotype | CHR | POS | LOD    | QTLxE |
|-----------|-----|-----|--------|-------|-----------|-----|-----|--------|-------|
| BIOMASS   | 1N  | 25  | 6.324  | yes   | HT        | 2K  | 11  | 8.572  | yes   |
| BIOMASS   | 2K  | 63  | 9.841  | yes   | HT        | 2K  | 65  | 7.611  | yes   |
| BIOMASS   | 3K  | 66  | 7.127  | yes   | HT        | 2N  | 47  | 10.205 | yes   |
| BIOMASS   | 3N  | 21  | 7.927  | yes   | HT        | 3K  | 35  | 14.093 | yes   |
| BIOMASS   | 3N  | 83  | 9.427  | yes   | HT        | 3N  | 6   | 5.112  | yes   |
| BIOMASS   | 4N  | 33  | 4.572  | yes   | HT        | 3N  | 75  | 11.556 | yes   |
| BIOMASS   | 5K  | 82  | 6.324  | yes   | HT        | 4K  | 45  | 3.772  | yes   |
| BIOMASS   | 5N  | 89  | 6.057  | yes   | HT        | 5K  | 0   | 7.203  | yes   |
| BIOMASS   | 6N  | 44  | 4.673  | yes   | HT        | 5N  | 11  | 5.114  | yes   |
| BIOMASS   | 7K  | 38  | 4.453  | yes   | HT        | 5N  | 89  | 14.093 | yes   |
| BIOMASS   | 8K  | 54  | 4.021  | yes   | HT        | 6K  | 30  | 4.717  | yes   |
| BIOMASS   | 9K  | 22  | 6.491  | yes   | HT        | 6N  | 60  | 7.141  | yes   |
| BIOMASS   | 9K  | 84  | 6.836  | yes   | HT        | 7K  | 31  | 4.647  | no    |
| BIOMASS   | 9N  | 83  | 4.032  | yes   | HT        | 9K  | 24  | 7.844  | yes   |
| BIOMASS   | 9N  | 119 | 6.586  | yes   | HT        | 9K  | 81  | 3.92   | no    |
| FL50      | 1N  | 84  | 5.3    | yes   | HT        | 9N  | 47  | 7.977  | yes   |
| FL50      | 2K  | 0   | 12.472 | yes   | TC        | 1N  | 35  | 3.741  | no    |
| FL50      | 2K  | 60  | 10.604 | yes   | TC        | 2K  | 63  | 11.629 | yes   |
| FL50      | 2N  | 73  | 22.39  | yes   | TC        | 3K  | 35  | 8.043  | no    |
| FL50      | 3K  | 48  | 4.928  | yes   | TC        | 3N  | 11  | 4.256  | no    |
| FL50      | 3N  | 40  | 3.932  | yes   | TC        | 3N  | 51  | 5.925  | yes   |
| FL50      | 4K  | 9   | 15.651 | yes   | TC        | 3N  | 83  | 4.362  | yes   |
| FL50      | 5K  | 24  | 3.843  | yes   | TC        | 5K  | 51  | 5.733  | yes   |
| FL50      | 5K  | 89  | 7.678  | yes   | TC        | 6K  | 10  | 3.58   | yes   |
| FL50      | 5N  | 5   | 43.992 | yes   | TC        | 6N  | 50  | 3.783  | yes   |
| FL50      | 5N  | 92  | 45.577 | yes   | TC        | 7K  | 33  | 7.7    | yes   |
| FL50      | 6K  | 51  | 4.331  | yes   | TC        | 8N  | 49  | 5.238  | no    |
| FL50      | 6N  | 0   | 5.073  | yes   | TC        | 9K  | 81  | 4.622  | yes   |
| FL50      | 7K  | 12  | 3.575  | yes   | TC        | 9N  | 38  | 7.78   | yes   |
| FL50      | 8N  | 13  | 4.753  | no    | TC        | 9N  | 83  | 8.671  | yes   |
| FL50      | 9K  | 13  | 6.235  | yes   |           |     |     |        |       |
| FL50      | 9N  | 22  | 4.902  | yes   |           |     |     |        |       |
| FL50      | 9N  | 58  | 4.65   | yes   |           |     |     |        |       |
| FL50      | 9N  | 111 | 6.522  | yes   |           |     |     |        |       |
| GR50      | 1K  | 62  | 5.556  | yes   |           |     |     |        |       |
| GR50      | 1N  | 43  | 5.696  | yes   |           |     |     |        |       |
| GR50      | 1N  | 80  | 4.777  | yes   |           |     |     |        |       |
| GR50      | 2K  | 10  | 7.866  | yes   |           |     |     |        |       |
| GR50      | 2K  | 65  | 4.051  | yes   |           |     |     |        |       |
| GR50      | 2N  | 99  | 5.702  | yes   |           |     |     |        |       |
| GR50      | 3N  | 19  | 3.709  | yes   |           |     |     |        |       |
| GR50      | 3N  | 88  | 4.162  | yes   |           |     |     |        |       |
| GR50      | 5K  | 89  | 9.18   | yes   |           |     |     |        |       |
| GR50      | 7K  | 1   | 5.004  | no    |           |     |     |        |       |
| GR50      | 7K  | 59  | 5.63   | yes   |           |     |     |        |       |
| GR50      | 8K  | 30  | 9.036  | yes   |           |     |     |        |       |
| GR50      | 9K  | 57  | 3.636  | yes   |           |     |     |        |       |
| GR50      | 9N  | 51  | 4.235  | yes   |           |     |     |        |       |

**Table S2** Heritability ( $H^2$ ) by trait and site with standard errors (SE).

| SITE | YEAR | TRAIT   | $H^2$ | SE   |
|------|------|---------|-------|------|
| BRKG | 2017 | GR50    | 0.31  | 0.11 |
| BRKG | 2017 | FL50    | 0.58  | 0.09 |
| BRKG | 2017 | TC_EOS  | 0.21  | 0.11 |
| BRKG | 2017 | HT_EOS  | 0.66  | 0.07 |
| BRKG | 2017 | BIOMASS | 0.69  | 0.07 |
| CLMB | 2017 | GR50    | 0.49  | 0.08 |
| CLMB | 2017 | FL50    | 0.63  | 0.07 |
| CLMB | 2017 | TC_EOS  | 0.3   | 0.1  |
| CLMB | 2017 | HT_EOS  | 0.58  | 0.07 |
| CLMB | 2017 | BIOMASS | 0.6   | 0.07 |
| KBSM | 2017 | GR50    | 0.17  | 0.1  |
| KBSM | 2017 | FL50    | 0.78  | 0.05 |
| KBSM | 2017 | TC_EOS  | 0.46  | 0.09 |
| KBSM | 2017 | HT_EOS  | 0.79  | 0.05 |
| KBSM | 2017 | BIOMASS | 0.6   | 0.07 |
| KING | 2017 | GR50    | 0.53  | 0.09 |
| KING | 2017 | FL50    | 0.61  | 0.08 |
| KING | 2017 | TC_EOS  | 0.23  | 0.11 |
| KING | 2017 | HT_EOS  | 0.31  | 0.11 |
| KING | 2017 | BIOMASS | 0.12  | 0.11 |
| LINC | 2017 | GR50    | 0.31  | 0.11 |
| LINC | 2017 | FL50    | 0     | 0.13 |
| LINC | 2017 | TC_EOS  | 0.61  | 0.08 |
| LINC | 2017 | HT_EOS  | 0.62  | 0.08 |
| LINC | 2017 | BIOMASS | 0.61  | 0.08 |
| MNHT | 2017 | GR50    | 0.56  | 0.09 |
| MNHT | 2017 | FL50    | 0.88  | 0.04 |
| MNHT | 2017 | TC_EOS  | 0.33  | 0.11 |
| MNHT | 2017 | HT_EOS  | 0.82  | 0.05 |
| MNHT | 2017 | BIOMASS | 0.55  | 0.09 |
| OVTN | 2017 | GR50    | 0.72  | 0.06 |
| OVTN | 2017 | FL50    | 0.55  | 0.09 |
| OVTN | 2017 | TC_EOS  | 0.61  | 0.08 |
| OVTN | 2017 | HT_EOS  | 0.61  | 0.08 |
| OVTN | 2017 | BIOMASS | 0.71  | 0.07 |
| PKLE | 2017 | GR50    | 0.65  | 0.07 |
| PKLE | 2017 | FL50    | 0.79  | 0.05 |
| PKLE | 2017 | TC_EOS  | NA    | NA   |
| PKLE | 2017 | HT_EOS  | 0.62  | 0.07 |
| PKLE | 2017 | BIOMASS | 0.46  | 0.09 |
| STIL | 2017 | GR50    | 0.53  | 0.09 |
| STIL | 2017 | FL50    | 0.73  | 0.06 |
| STIL | 2017 | TC_EOS  | 0.34  | 0.11 |
| STIL | 2017 | HT_EOS  | 0.7   | 0.07 |
| STIL | 2017 | BIOMASS | 0.67  | 0.07 |
| TMPL | 2017 | GR50    | 0.8   | 0.05 |
| TMPL | 2017 | FL50    | 0.53  | 0.09 |
| TMPL | 2017 | TC_EOS  | 0.45  | 0.1  |
| TMPL | 2017 | HT_EOS  | 0.59  | 0.08 |
| TMPL | 2017 | BIOMASS | 0.63  | 0.08 |

**Table S3.** Location and timing of growing season by site. Greenup and flowering are given as Julian Days.

| id   | lat      | lon       | First Greenup | Last Flowering |
|------|----------|-----------|---------------|----------------|
| BRKG | 44.3068  | -96.6705  | 122           | 240            |
| CLMB | 38.8969  | -92.2178  | 90            | 230            |
| KBSM | 42.41962 | -85.37127 | 113           | 258            |
| KING | 27.54986 | -97.88101 | 23            | 133            |
| LINC | 41.1543  | -96.4153  | 109           | 256            |
| MNHT | 39.1407  | -96.6389  | 80            | 231            |
| OVTN | 32.3029  | -94.9794  | 47            | 197            |
| PKLE | 30.38398 | -97.72938 | 39            | 163            |
| STIL | 35.99115 | -97.04649 | 69            | 220            |
| TMPL | 31.04338 | -97.3495  | 52            | 215            |

**Table S4.** Bioclim variables at each site. Columns 1-19 indicate the numbers of each of the 19 bioclim variables.

| id   | 1   | 2   | 3  | 4     | 5   | 6    | 7   | 8   | 9   | 10  | 11  | 12   | 13  | 14 | 15 | 16  | 17  | 18  | 19  |
|------|-----|-----|----|-------|-----|------|-----|-----|-----|-----|-----|------|-----|----|----|-----|-----|-----|-----|
| BRKG | 61  | 126 | 27 | 11695 | 287 | -179 | 466 | 182 | -99 | 205 | -99 | 584  | 99  | 10 | 60 | 257 | 35  | 254 | 35  |
| CLMB | 122 | 117 | 30 | 9515  | 314 | -75  | 389 | 219 | -6  | 241 | -6  | 977  | 121 | 38 | 30 | 326 | 139 | 294 | 139 |
| KBSM | 87  | 113 | 29 | 9696  | 286 | -100 | 386 | 198 | -30 | 208 | -43 | 906  | 98  | 39 | 24 | 275 | 147 | 271 | 153 |
| KING | 223 | 117 | 41 | 5686  | 354 | 75   | 279 | 267 | 159 | 291 | 145 | 685  | 119 | 24 | 46 | 266 | 103 | 201 | 110 |
| LINC | 102 | 127 | 29 | 10550 | 312 | -117 | 429 | 212 | -40 | 234 | -40 | 772  | 111 | 16 | 52 | 308 | 58  | 295 | 58  |
| MNHT | 123 | 131 | 31 | 10029 | 329 | -90  | 419 | 225 | -12 | 249 | -12 | 852  | 136 | 20 | 51 | 352 | 70  | 322 | 70  |
| OVTN | 181 | 128 | 37 | 7359  | 344 | 6    | 338 | 220 | 267 | 272 | 81  | 1132 | 121 | 54 | 18 | 331 | 220 | 225 | 277 |
| PKLE | 195 | 122 | 38 | 6920  | 351 | 32   | 319 | 233 | 118 | 281 | 103 | 835  | 113 | 42 | 32 | 278 | 160 | 185 | 163 |
| STIL | 155 | 131 | 33 | 8915  | 346 | -43  | 389 | 203 | 36  | 267 | 36  | 881  | 135 | 29 | 40 | 317 | 108 | 250 | 108 |
| TMPL | 190 | 126 | 36 | 7408  | 355 | 13   | 342 | 231 | 107 | 281 | 89  | 872  | 115 | 47 | 26 | 284 | 177 | 186 | 179 |

**Table S5.** Growing season-adjusted climate variables. Variables with '14' in the name represent the most extreme 14-day period for that value. For example, HOT14 is the mean TMAX of the hottest 14-day period.

| id   | season | TMAX  | TMIN   | PRCP | HOT14 | COLD14 | DRY14 | WET14 | CV_PRCP | CV_TMAX |
|------|--------|-------|--------|------|-------|--------|-------|-------|---------|---------|
| BRKG | early  | 28.5  | -1.06  | 2.46 | 23.65 | 0.79   | 0.42  | 6.39  | 1.24    | 1.32    |
| CLMB | early  | 28.29 | -2.21  | 4.74 | 23.75 | 1.09   | 0.8   | 13.44 | 1.26    | 1.29    |
| KBSM | early  | 27.45 | -0.27  | 2.72 | 23.19 | 4.08   | 0.71  | 4.36  | 1.02    | 0.99    |
| KING | early  | 34.34 | 0.98   | 0.5  | 28.8  | 9.04   | 0.04  | 1.43  | 1.34    | 0.74    |
| LINC | early  | 30.23 | -1.11  | 4.35 | 25.99 | 2.7    | 0.65  | 11.94 | 1.27    | 1.15    |
| MNHT | early  | 27.05 | -5.05  | 3.57 | 23.89 | -1.15  | 0.04  | 11.38 | 1.41    | 1.56    |
| OVTN | early  | 28.73 | 1.43   | 2.78 | 26.94 | 7.26   | 0.03  | 5.48  | 1.4     | 0.81    |
| PKLE | early  | 29.7  | 4.41   | 2.01 | 26.21 | 8.67   | 0     | 4.55  | 1.41    | 0.71    |
| STIL | early  | 28.91 | -2.58  | 3.12 | 20.19 | 3.17   | 0     | 7.25  | 1.41    | 1.03    |
| TMPL | early  | 28.98 | 4.27   | 5.43 | 27.23 | 9.48   | 0.24  | 17.56 | 1.38    | 0.68    |
| BRKG | middle | 32.22 | 7.22   | 2.49 | 30.08 | 10.95  | 0.05  | 7.66  | 1.39    | 0.66    |
| CLMB | middle | 32.39 | 6.29   | 3.33 | 30.14 | 10.04  | 0.13  | 5.41  | 1.35    | 0.71    |
| KBSM | middle | 31.42 | 9      | 1.59 | 29.08 | 10.65  | 0.14  | 4.57  | 1.33    | 0.66    |
| KING | middle | 33.5  | 7.76   | 2.3  | 31.09 | 12.52  | 0     | 7.93  | 1.41    | 0.6     |
| LINC | middle | 35    | 7.72   | 2.44 | 32.91 | 10.99  | 0     | 5.42  | 1.41    | 0.71    |
| MNHT | middle | 35.24 | 4.42   | 2.9  | 33.86 | 6.47   | 0.16  | 6.1   | 1.34    | 0.96    |
| OVTN | middle | 30.75 | 7.5    | 4.68 | 28.33 | 10.65  | 0.92  | 10.54 | 1.19    | 0.64    |
| PKLE | middle | 32.41 | 9.39   | 1.29 | 30.5  | 14.19  | 0     | 3.54  | 1.41    | 0.52    |
| STIL | middle | 34.07 | 5.56   | 4.49 | 33.23 | 7.24   | 0.44  | 12.99 | 1.32    | 0.91    |
| TMPL | middle | 32.65 | 9.36   | 4.66 | 31.51 | 12.62  | 0.1   | 16.29 | 1.4     | 0.61    |
| BRKG | late   | 30.67 | 8.33   | 4.14 | 28.69 | 12.74  | 0.49  | 7.78  | 1.25    | 0.54    |
| CLMB | late   | 33.54 | 12.02  | 3.4  | 32.7  | 15.33  | 0.64  | 5.84  | 1.14    | 0.51    |
| KBSM | late   | 33.36 | 5.67   | 1.22 | 29.65 | 7.68   | 0.29  | 3.29  | 1.19    | 0.83    |
| KING | late   | 36.66 | 9.38   | 0.83 | 33.04 | 15.44  | 0     | 2.07  | 1.41    | 0.51    |
| LINC | late   | 34.67 | -17.78 | 2.19 | 28.35 | 4.27   | 0     | 4.81  | 1.41    | 1.04    |
| MNHT | late   | 38.45 | 12.2   | 3.86 | 36.44 | 15.79  | 0     | 9.42  | 1.41    | 0.56    |
| OVTN | late   | 34.88 | 15.32  | 4.01 | 33.99 | 17.88  | 0.38  | 11.01 | 1.32    | 0.44    |
| PKLE | late   | 36.17 | 13.65  | 2.82 | 34.96 | 17     | 0     | 6.88  | 1.41    | 0.49    |
| STIL | late   | 37.86 | 17.8   | 4.51 | 36.34 | 19.38  | 0     | 9.36  | 1.41    | 0.43    |
| TMPL | late   | 37.09 | 20.29  | 1.12 | 36.54 | 21.87  | 0.02  | 3.39  | 1.4     | 0.36    |

**Table S6.** PCA-prediction models for each QTL. P-values, estimates, and standard errors (se) are from the meta-regression model.

| qtl               | pca | pvalue   | estimate   | se         |
|-------------------|-----|----------|------------|------------|
| 1K@62_AxB_GR50    | PC2 | 1.69E-06 | -0.1529598 | 0.03195185 |
| 1N@43_CxD_GR50    | PC1 | 4.14E-12 | 0.10650203 | 0.01536345 |
| 2K@0_AxB_FL50     | PC5 | 2.49E-10 | -0.9511095 | 0.15031327 |
| 2K@60_CxD_FL50    | PC1 | 1.16E-07 | 0.21816976 | 0.04116291 |
| 2K@65_CxD_GR50    | PC1 | 2.58E-11 | 0.09875858 | 0.0148087  |
| 2K@65_CxD_HT      | PC1 | 7.48E-04 | 0.25569738 | 0.07584762 |
| 2N@73_AxB_FL50    | PC4 | 1.84E-03 | -0.4084895 | 0.13114279 |
| 3K@35_CxD_HT      | PC3 | 1.74E-03 | -0.3631476 | 0.1159534  |
| 3N@19_AxB_GR50    | PC1 | 6.03E-05 | -0.0580793 | 0.01447824 |
| 3N@83_AxB_TC      | PC1 | 1.93E-03 | -1.5832242 | 0.51054438 |
| 3N@83_CxD_BIOMASS | PC1 | 1.10E-14 | 0.01720839 | 0.00222714 |
| 4K@9_AxB_FL50     | PC3 | 8.82E-09 | -0.3846621 | 0.06687543 |
| 5K@0_AxB_HT       | PC3 | 1.88E-03 | 0.36690346 | 0.1180204  |
| 5K@24_AxB_FL50    | PC4 | 1.02E-05 | -0.5815387 | 0.13180912 |
| 5K@89_AxB_GR50    | PC1 | 4.78E-07 | 0.07165651 | 0.01423217 |
| 5K@89_CxD_FL50    | PC1 | 7.91E-05 | 0.15998541 | 0.04053088 |
| 5K@89_CxD_GR50    | PC1 | 3.40E-20 | 0.12896932 | 0.01401011 |
| 5N@11_AxB_HT      | PC1 | 6.24E-05 | 0.28829614 | 0.07201102 |
| 5N@5_AxB_FL50     | PC1 | 7.22E-16 | 0.34054802 | 0.04221671 |
| 5N@89_AxB_BIOMASS | PC4 | 1.22E-04 | -0.026266  | 0.00683545 |
| 5N@89_AxB_HT      | PC3 | 8.13E-05 | -0.4543317 | 0.1152933  |
| 5N@92_AxB_FL50    | PC4 | 2.07E-29 | -1.4905572 | 0.13237842 |
| 6K@30_CxD_HT      | PC1 | 2.13E-03 | -0.2229823 | 0.072604   |
| 6N@60_AxB_HT      | PC1 | 1.08E-04 | -0.2831396 | 0.07313074 |
| 7K@59_AxB_GR50    | PC1 | 6.33E-12 | 0.09706265 | 0.01412441 |
| 8K@30_CxD_GR50    | PC1 | 8.22E-07 | 0.06991322 | 0.01418117 |
| 9K@13_AxB_FL50    | PC5 | 9.68E-04 | -0.5173235 | 0.15677964 |
| 9K@22_AxB_BIOMASS | PC4 | 1.51E-04 | -0.026314  | 0.00694317 |
| 9K@24_AxB_HT      | PC4 | 1.09E-04 | -0.8319401 | 0.21500469 |
| 9K@57_AxB_GR50    | PC1 | 4.07E-04 | -0.0506913 | 0.01433696 |
| 9N@111_CxD_FL50   | PC1 | 1.85E-04 | 0.15666809 | 0.04190389 |
| 9N@51_AxB_GR50    | PC1 | 2.28E-11 | 0.09444649 | 0.01412441 |
| 9N@83_CxD_BIOMASS | PC1 | 3.08E-11 | -0.015284  | 0.00230084 |
| 9N@83_CxD_TC      | PC1 | 4.00E-07 | -2.4772993 | 0.48873342 |

**Table S7.** Model parameter summaries for estimation of first green-up and last flowering at each site across two years.

| Trait     | Coefficient | T-value | P-value  |
|-----------|-------------|---------|----------|
| Green-up  | Year        | -12.179 | 3.53e-09 |
|           | PCA1        | -50.884 | < 2e-16  |
|           | PCA9        | 4.552   | 0.000381 |
|           | PCA10       | -2.018  | 0.061854 |
| Flowering | PCA1        | 8.503   | 4.03e-07 |
|           | PCA3        | -2.342  | 0.03342  |
|           | PCA4        | 3.913   | 0.00139  |
|           | Year*PC6    | 2.950   | -0.00993 |
